# Supplementary material for: Rejuvant®, a potential life-extending compound formulation with alpha-ketoglutarate and vitamins, conferred an average 8 year reduction in biological aging, after an average of 7 months of use, in the TruAge DNA methylation test
Source: Aging (Albany NY). 2021 Nov 30;13(22):24485–99. doi: 10.18632/aging.203736 (PMC8660611; doi:10.18632/aging.203736)
Supplement: Supplementary Table 2 [file aging-13-203736-s002.xlsx]

## Sheet: Sheet1
Test if the other variables are predicative of chronological age while accounting for TruAge									Supplementary Table 2. Regression models used (with coefficients).
The full model						The final model after stepwise regression						Analysis of Variance Table
term	estimate	std.error	statistic	p.value		term	estimate	std.error	statistic	p.value
(Intercept)	27.1356	12.5583	2.16078	0.119488		(Intercept)	-2.92793	18.0393	-0.162309	0.873229		Model 1: ChronAge ~ BMI + BioAge_T0 + None.of.the.above + Omnivore + Pescetarian +
BMI	-0.956468	0.357681	-2.67409	0.0754275		BMI	-0.882015	0.441424	-1.99811	0.0641692		Vegetarian + as.factor(alcohol) + as.factor(sleep) + as.factor(exercise) +
BioAge_T0	0.747834	0.107418	6.9619	0.0060804		BioAge_T0	0.824177	0.126266	6.5273	9.6e-06		as.factor(meals) + snacks + as.factor(believer) + as.factor(activityLevel) +
GenderMale	10.4398	3.36417	3.10325	0.0531607		None.of.the.above	6.06714	3.5243	1.72151	0.10571		as.factor(hair)
Low.Carb	5.89351	4.14973	1.42022	0.250632		Omnivore	7.28592	3.60293	2.02222	0.0613627		Model 2: ChronAge ~ BioAge_T0
None.of.the.above	13.8668	4.01987	3.44957	0.0409495		Pescetarian	-11.4085	4.03854	-2.82491	0.0127995		Res.Df RSS Df Sum of Sq F Pr(>F)
Omnivore	21.5383	4.3495	4.9519	0.0158054		Vegetarian	10.0799	3.47976	2.89671	0.0110682		1 15 390.36
Paleo	-8.17952	5.78918	-1.4129	0.252564		as.factor(alcohol)1to4	1.16213	3.00136	0.387202	0.704045		2 40 1674.91 -25 -1284.5 1.9744 0.08628 .
Pescetarian	-10.8939	2.89192	-3.76702	0.0327324		as.factor(alcohol)5to8	2.79314	3.27894	0.851842	0.407697		---
Vegetarian	17.9222	3.5451	5.0555	0.0149332		as.factor(alcohol)9to14	-9.15642	4.55256	-2.01127	0.0626233		Signif. codes: 0 ‘***’ 0.001 ‘**’ 0.01 ‘*’ 0.05 ‘.’ 0.1 ‘ ’ 1
as.factor(alcohol)1to4	-8.42362	3.76174	-2.23929	0.111034		as.factor(sleep)7-8 hours	-28.1233	9.69426	-2.90103	0.0109717
as.factor(alcohol)5to8	0.561205	2.78035	0.201847	0.852948		as.factor(sleep)More than 8 hours	-9.3393	8.658	-1.07869	0.297767
as.factor(alcohol)9to14	-26.027	6.20636	-4.1936	0.0247317		as.factor(exercise)3+ times/week	17.0232	6.12691	2.77843	0.0140581
as.factor(supplements)1to2	3.06243	4.35785	0.70274	0.53284		as.factor(exercise)Daily	9.05523	6.3956	1.41585	0.177247
as.factor(supplements)3to4	-8.74265	4.07333	-2.14632	0.121128		as.factor(exercise)Rarely	4.06917	7.75045	0.525023	0.607241
as.factor(supplements)5	-8.30465	4.56872	-1.81772	0.1667		as.factor(meals)2	26.095	12.6691	2.05974	0.0572174
as.factor(sleep)7-8 hours	-100.636	19.5277	-5.15348	0.0141652		as.factor(meals)3	30.1311	12.9795	2.32143	0.0347526
as.factor(sleep)More than 8 hours	-64.2113	14.8402	-4.32686	0.0227596		as.factor(meals)4 or more	7.40748	10.0297	0.738554	0.471577
as.factor(General_health)Moderate	-62.4469	9.75293	-6.40289	0.0077173		snacks	3.85596	2.33226	1.65332	0.119037
as.factor(General_health)Very good	-5.67029	1.48472	-3.8191	0.0315926		as.factor(believer)Interested	-7.14628	3.27013	-2.18532	0.0451416
as.factor(smoking)Past smoker but quit	7.86594	2.32112	3.38886	0.0428107		as.factor(believer)No opinion	-13.0212	6.30446	-2.06539	0.0566155
as.factor(exercise)3+ times/week	45.077	7.92771	5.686	0.0107817		as.factor(believer)Skeptical	-2.86931	3.90331	-0.735098	0.473617
as.factor(exercise)Daily	38.9978	7.25878	5.3725	0.0126259		as.factor(activityLevel)Mildly Active	7.37762	5.23161	1.4102	0.178879
as.factor(exercise)Rarely	1.77428	9.35396	0.189682	0.861667		as.factor(activityLevel)Sedentary	12.2267	6.86842	1.78013	0.0953154
as.factor(Education)Graduate-level degree	-6.38154	3.32843	-1.91728	0.151041		as.factor(activityLevel)Very Active	3.62327	3.23181	1.12113	0.279863
as.factor(Education)High school diploma (or GED)	-1.49904	5.88738	-0.254619	0.815474		as.factor(hair)Thick and/or Full	12.0283	4.62475	2.60086	0.0200646
as.factor(Education)Some college	-9.81907	4.41288	-2.2251	0.112508		as.factor(hair)Thinning	14.0186	4.78776	2.928	0.0103875
as.factor(meals)2	32.1279	13.2029	2.4334	0.0930467
as.factor(meals)3	39.7054	13.1048	3.02983	0.0563187
as.factor(meals)4 or more	-15.7333	8.27065	-1.90231	0.153283
snacks	3.08177	2.03745	1.51256	0.227591
as.factor(believer)Interested	-13.6836	2.73031	-5.01174	0.0152938
as.factor(believer)No opinion	-9.41137	6.52337	-1.44272	0.244793
as.factor(believer)Skeptical	-7.15284	2.5128	-2.84657	0.065293
as.factor(activityLevel)Mildly Active	28.3211	7.97831	3.54977	0.038097
as.factor(activityLevel)Sedentary	33.9086	6.36302	5.329	0.0129136
as.factor(activityLevel)Very Active	6.37576	2.77863	2.29457	0.105513
as.factor(hair)Thick and/or Full	30.7597	6.65398	4.62275	0.0190568
as.factor(hair)Thinning	30.3913	6.71709	4.52448	0.0201937

## Sheet: Sheet2
Gender does not influence the estimation of biological age using TruMe.
term	estimate	std.error	statistic	p.value
(Intercept)	8.65861	7.23839	1.19621	0.238838
BioAge_T0	0.882531	0.115016	7.67313	0
as.factor(Gender)Male	-1.66056	2.1288	-0.780046	0.440073

## Sheet: Sheet3
Assessing if the difference between biological and chronological age are related with covariates.
The full model						Only the intercept is selected after stepwise regression.
term	estimate	std.error	statistic	p.value		term	estimate	std.error	statistic	p.value
(Intercept)	4.54676	13.5486	0.335588	0.740097		(Intercept)	0.352958	0.999438	0.353156	0.725781
BMI	-0.346996	0.421344	-0.823545	0.418307
as.factor(alcohol)1to4	5.67147	3.74466	1.51455	0.142946
as.factor(alcohol)5to8	1.78083	3.78488	0.47051	0.642238
as.factor(alcohol)9to14	-0.230816	4.33595	-0.0532331	0.957987
as.factor(General_health)Moderate	7.23236	12.2763	0.589133	0.561277
as.factor(General_health)Very good	-2.27546	3.14607	-0.723271	0.476504
as.factor(sleep)7-8 hours	3.22133	10.502	0.306734	0.761692
as.factor(sleep)More than 8 hours	12.2102	10.862	1.12412	0.272079
as.factor(smoking)Past smoker but quit	-0.351386	4.13103	-0.0850602	0.932919
as.factor(exercise)3+ times/week	-0.153975	5.74525	-0.0268004	0.978841
as.factor(exercise)Daily	1.56902	6.66573	0.235385	0.815906
as.factor(exercise)Rarely	6.31707	9.76977	0.646594	0.524031
as.factor(activityLevel)Mildly Active	-1.55804	4.73951	-0.328734	0.745208
as.factor(activityLevel)Sedentary	-9.6872	6.73844	-1.4376	0.163458
as.factor(activityLevel)Very Active	-0.524516	3.19918	-0.163953	0.871141
as.factor(hair)Thick and/or Full	-0.575469	5.23888	-0.109846	0.913445
as.factor(hair)Thinning	1.60979	5.06684	0.317711	0.753452

## Sheet: Sheet4
Using the full cohort
												Analysis of Variance Table
First iteration
The full model						After stepwise regression						Model 1: rejuvenation ~ differentialDiet + differential.supplementation +
term	estimate	std.error	statistic	p.value		term	estimate	std.error	statistic	p.value		sleep.improv + differentialExercise + BMI + diffAgeT0 + ChronAge +
(Intercept)	0.59266	34.8626	0.0169999	0.986716		(Intercept)	10.9699	9.91808	1.10605	0.277796		Gender + Low.Carb + None.of.the.above + Omnivore + Paleo +
differentialDiet	3.94419	3.82966	1.0299	0.323367		differentialDiet	2.84607	1.9806	1.43697	0.161428		Pescetarian + Vegetarian + timeEllapsed + as.numeric(as.factor(alcohol)) +
differential.supplementation	-3.42923	4.59649	-0.746054	0.469998		sleep.improvTRUE	-7.65876	3.40471	-2.24946	0.0322447		as.numeric(as.factor(supplements)) + as.numeric(as.factor(General_health)) +
sleep.improvTRUE	-6.83095	5.71334	-1.19561	0.25494		diffAgeT0	-0.580941	0.129633	-4.48144	0.0001069		as.numeric(as.factor(sleep)) + as.numeric(as.factor(smoking)) +
differentialExercise	0.161483	3.48771	0.0463004	0.963832		ChronAge	0.229549	0.0841534	2.72774	0.0107136		as.numeric(as.factor(exercise)) + as.numeric(as.factor(Education)) +
BMI	-0.128756	0.5986	-0.215096	0.833305		Vegetarian	-3.0103	2.38509	-1.26213	0.216957		as.numeric(as.factor(believer)) + as.numeric(as.factor(meals)) +
diffAgeT0	-0.575145	0.335526	-1.71416	0.112187		timeEllapsed	-11.7933	7.07061	-1.66793	0.106094		snacks + as.numeric(as.factor(mindset)) + as.numeric(as.factor(activityLevel)) +
ChronAge	0.239169	0.190999	1.2522	0.234353		as.numeric(as.factor(alcohol))	1.98935	0.758101	2.62413	0.0137122		as.numeric(as.factor(hair)) + as.numeric(as.factor(nSupplements))
GenderMale	-1.39642	3.97962	-0.350893	0.731752		as.numeric(as.factor(supplements))	2.93032	0.960312	3.05142	0.0048349		Model 2: rejuvenation ~ diffAgeT0 + ChronAge
Low.Carb	1.98044	7.43732	0.266284	0.794541		as.numeric(as.factor(smoking))	-6.49173	2.28306	-2.84343	0.0080952		Res.Df RSS Df Sum of Sq F Pr(>F)
None.of.the.above	2.42949	7.56044	0.321342	0.753479		as.numeric(as.factor(exercise))	-2.42646	1.16211	-2.08798	0.0456921		1 12 432.66
Omnivore	0.811639	7.2889	0.111353	0.913177		as.numeric(as.factor(believer))	-1.63903	0.965479	-1.69764	0.100284		2 39 984.19 -27 -551.52 0.5665 0.8927
Paleo	1.50034	9.02181	0.166301	0.870689		snacks	2.51366	1.2352	2.03503	0.0510798
Pescetarian	2.06578	5.51775	0.374388	0.714647
Vegetarian	-3.28718	6.75185	-0.486857	0.635131
timeEllapsed	-8.25541	12.7062	-0.649717	0.528117
as.numeric(as.factor(alcohol))	3.09579	2.33107	1.32806	0.208867
as.numeric(as.factor(supplements))	2.67951	2.2555	1.18799	0.257819
as.numeric(as.factor(General_health))	1.5526	3.35158	0.463245	0.651478
as.numeric(as.factor(sleep))	-2.16138	4.34529	-0.497408	0.62789
as.numeric(as.factor(smoking))	-6.29212	3.65834	-1.71994	0.111104
as.numeric(as.factor(exercise))	-3.07298	2.87354	-1.0694	0.305927
as.numeric(as.factor(Education))	0.868396	1.95924	0.443232	0.665483
as.numeric(as.factor(believer))	-1.52141	1.85993	-0.817993	0.429305
as.numeric(as.factor(meals))	-0.353069	2.44425	-0.144449	0.887544
snacks	4.02377	2.5853	1.5564	0.145581
as.numeric(as.factor(mindset))	2.02171	3.96238	0.510227	0.619147
as.numeric(as.factor(activityLevel))	-1.18404	2.09448	-0.565314	0.582275
as.numeric(as.factor(hair))	0.395298	2.68249	0.147362	0.885293
as.numeric(as.factor(nSupplements))	1.19536	7.13818	0.16746	0.869797
Second iteration
Full model						After stepwise regression
term	estimate	std.error	statistic	p.value		term	estimate	std.error	statistic	p.value
(Intercept)	6.9416	9.26753	0.749023	0.459149		(Intercept)	-2.6837	6.73852	-0.398262	0.692856
diffAgeT0	-0.568322	0.131472	-4.32276	0.0001335		diffAgeT0	-0.559542	0.131793	-4.24561	0.0001525
ChronAge	0.207639	0.088364	2.34981	0.024916		ChronAge	0.2197	0.0876433	2.50675	0.01698
sleep.improvTRUE	-5.99876	3.52592	-1.70133	0.0982865		sleep.improvTRUE	-6.52237	3.47748	-1.8756	0.0690716
as.numeric(as.factor(supplements))	1.45339	0.76511	1.89958	0.0662576		as.numeric(as.factor(supplements))	1.08616	0.718792	1.51109	0.139744
timeEllapsed	-9.71386	7.44056	-1.30553	0.200742		as.numeric(as.factor(alcohol))	1.55079	0.724487	2.14053	0.0393572
as.numeric(as.factor(alcohol))	1.60156	0.723058	2.21498	0.0337762		as.numeric(as.factor(smoking))	-2.99035	2.05268	-1.4568	0.154084
as.numeric(as.factor(smoking))	-4.04112	2.16035	-1.87059	0.0702935
as.numeric(as.factor(exercise))	-1.19937	1.07948	-1.11105	0.274575
Third iteration
Full model						After stepwise regression
term	estimate	std.error	statistic	p.value		term	estimate	std.error	statistic	p.value
(Intercept)	-9.63042	6.08539	-1.58255	0.121813		(Intercept)	-5.41367	5.57843	-0.970465	0.337795
diffAgeT0	-0.470558	0.137872	-3.41301	0.0015394		diffAgeT0	-0.451199	0.139969	-3.22357	0.0025598
ChronAge	0.24085	0.0893541	2.69546	0.0104132		ChronAge	0.219495	0.0900301	2.43802	0.0194269
as.numeric(as.factor(alcohol))	1.2211	0.770274	1.58528	0.121191
